# Supplementary material for: Understanding the structural requirements of hybrid (S)-6-((2-(4-phenylpiperazin-1-yl)ethyl)(propyl)amino)-5,6,7,8-tetrahydronaphthalen-1-ol and its analogs as D2/D3 receptor ligands: a 3D QSAR investigation
Source: Royal Society of Chemistry journal article supplement (doi:10.1039/c4md00159a), 2014-01-01
Supplement: c4md00159a1.pdf [file c4md00159a1.pdf]

## Supplementary Information

### Understanding the Structural Requirements of Hybrid (S)-6-((2-(4-Phenylpiperazin-1-yl)ethyl)(propyl)amino)-5,6,7,8-tetrahydronaphthalen-1-ol and its Analogs as D2/D3

#### Receptor Ligands: A 3D QSAR Investigation

*Gyan Modi<sup>1</sup>, Horrick Sharma<sup>1</sup>, Prashant S. Kharkar<sup>2†\*</sup> and Alope K. Dutta<sup>1‡\*</sup>*

<sup>1</sup>Department of Pharmaceutical Sciences, Eugene Applebaum College of Pharmaceutical and Health Sciences (EACPHS), Wayne State University, Detroit, MI 48201. USA.

<sup>2</sup>Department of Pharmaceutical Chemistry, SPP School of Pharmacy and Technology Management (SPPSPTM), SVKM's NMIMS, Mumbai-400 056. India.

#### Table of Contents

| Description                                                                              | Page No. |
|------------------------------------------------------------------------------------------|----------|
| 1. Additional 3D QSAR Model Statistics for Dopamine Receptor Ligands                     | 2        |
| 2. Additional 3D-QSAR Selectivity (D2/D3) Model Statistics for Dopamine Receptor Ligands | 4        |
| 3. Molecular alignments                                                                  | 5        |

**Table 1.** Additional 3D QSAR Model Statistics for Dopamine Receptor Ligands

|                    | I <sup>a</sup>              | II <sup>b</sup>              | III <sup>c</sup>            | IV <sup>d</sup>              | V <sup>e</sup>               | VI <sup>f</sup>              | VII <sup>g</sup>             | VIII <sup>h</sup>            |
|--------------------|-----------------------------|------------------------------|-----------------------------|------------------------------|------------------------------|------------------------------|------------------------------|------------------------------|
| Test Set           | 8,9,13,<br>16,927,<br>40,41 | 8,9,13,<br>16,9,27,<br>40,41 | 8,9,13,<br>16,927,<br>40,41 | 8,9,13,<br>16,9,27,<br>40,41 | 8,9,13,<br>16,9,27,<br>40,41 | 8,9,13,<br>16,9,27,<br>40,41 | 8,9,13,<br>16,9,27,<br>40,41 | 8,9,13,<br>16,9,27,<br>40,41 |
| $r^2_{cv}$         | 0.644                       | 0.714                        | 0.665                       | 0.71                         | 0.249                        | 0.498                        | 0.339                        | 0.528                        |
| $r^2_{conv}$       | 0.864                       | 0.929                        | 0.889                       | 0.898                        | 0.937                        | 0.911                        | 0.935                        | 0.925                        |
| SEE                | 0.3                         | 0.221                        | 0.275                       | 0.26                         | 0.189                        | 0.209                        | 0.196                        | 0.194                        |
| Comp               | 3                           | 4                            | 4                           | 3                            | 5                            | 6                            | 6                            | 6                            |
| F value            | 63.47                       | 94.826                       | 58.28                       | 87.76                        | 80.91                        | 57.09                        | 62.58                        | 55.64                        |
| Pr <sup>2</sup> =0 | 0.00                        | 0.00                         | 0.00                        | 0.00                         | 0.00                         | 0.00                         | 0.00                         | 0.00                         |
| Steric             | 0.640                       | 0.667                        | 0.067                       | 0.083                        | 0.658                        | 0.385                        | 0.059                        | 0.028                        |
| Elecst             | 0.360                       | 0.333                        | 0.165                       | 0.103                        | 0.342                        | 0.615                        | 0.143                        | 0.176                        |
| Hydro.             | 0.00                        | 0.00                         | 0.226                       | 0.215                        | 0.00                         | 0.00                         | 0.186                        | 0.204                        |
| Donor              | 0.00                        | 0.00                         | 0.197                       | 0.241                        | 0.00                         | 0.00                         | 0.328                        | 0.300                        |
| Accp.              | 0.00                        | 0.00                         | 0.345                       | 0.357                        | 0.00                         | 0.00                         | 0.285                        | 0.292                        |
| $r^2_{pred}$       | 0.807                       | 0.902                        | 0.818                       | 0.881                        | 0.199                        | 0.614                        | 0.371                        | 0.608                        |

<sup>a</sup>CoMFA Model based on atom-based alignment and Gasteiger-Hückel charges for D2 receptor binding affinity.

<sup>b</sup>CoMFA Model based on flexible alignment and Gasteiger-Hückel charges for D2 receptor binding affinity.

<sup>c</sup>CoMSIA Model based on flexible alignment and MOPAC charges for D2 receptor binding affinity.

<sup>d</sup>CoMSIA Model based on atom-based alignment and Gasteiger-Hückel charges for D2 receptor binding affinity.

<sup>e</sup>CoMFA Model based on atom-based alignment and Gasteiger-Hückel charges for D3 receptor binding affinity.

<sup>f</sup>CoMFA Model based on flexible alignment and MOPAC charges for D3 receptor binding affinity.

<sup>g</sup>CoMSIA Model based on atom-based alignment and Gasteiger-Hückel charges for D3 receptor binding affinity.

<sup>h</sup>CoMSIA Model based on flexible alignment and MOPAC charges for D3 receptor binding affinity.

**Table 2.** Additional 3D-QSAR selectivity (D2/D3) Model Statistics for Dopamine

Receptor Ligands

|                    | I <sup>a</sup>        | II <sup>b</sup>       | III <sup>c</sup>      | IV <sup>d</sup>       |
|--------------------|-----------------------|-----------------------|-----------------------|-----------------------|
| Test Set           | 6,8,13,18,22,24,31,41 | 6,8,13,18,22,24,31,41 | 6,8,13,18,22,24,31,41 | 6,8,13,18,22,24,31,41 |
| $r^2_{cv}$         | 0.596                 | 0.601                 | 0.791                 | 0.768                 |
| $r^2_{conv}$       | 0.980                 | 0.973                 | 0.977                 | 0.898                 |
| SEE                | 0.099                 | 0.116                 | 0.104                 | 0.206                 |
| Comp               | 5                     | 5                     | 5                     | 2                     |
| F value            | 259.44                | 186.32                | 209.43                | 122.88                |
| Pr <sup>2</sup> =0 | 0.00                  | 0.00                  | 0.00                  | 0.00                  |
| Steric             | 0.642                 | 0.660                 | 0.064                 | 0.051                 |
| Elecst             | 0.358                 | 0.340                 | 0.146                 | 0.146                 |
| Hydro.             | 0.00                  | 0.00                  | 0.180                 | 0.143                 |
| Donor              | 0.00                  | 0.00                  | 0.272                 | 0.299                 |
| Accp.              | 0.00                  | 0.00                  | 0.333                 | 0.361                 |
| $r^2_{pred}$       | 0.809                 | 0.740                 | 0.753                 | 0.628                 |

<sup>a</sup> CoMFA Model based on atom-based alignment and Gasteiger-Huckel charges for dopamine D3 selectivity.

<sup>b</sup> CoMFA Model based on flexible alignment and Gasteiger-Huckel charges for dopamine D3 selectivity.

<sup>c</sup> CoMSIA Model based on atom-based alignment and Gasteiger-Huckel charges for dopamine D3 selectivity.

<sup>d</sup> CoMSIA Model based on flexible alignment and MOPAC charges for dopamine D3 selectivity.

a)

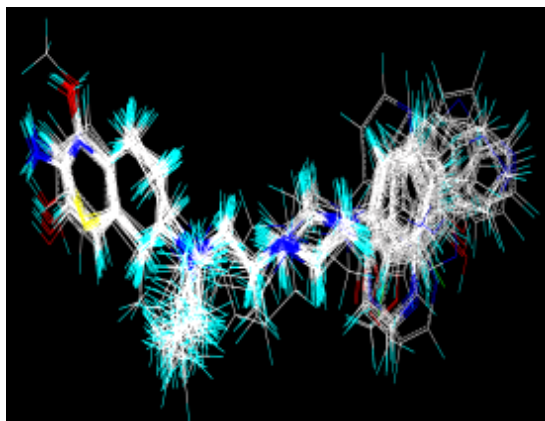

b)

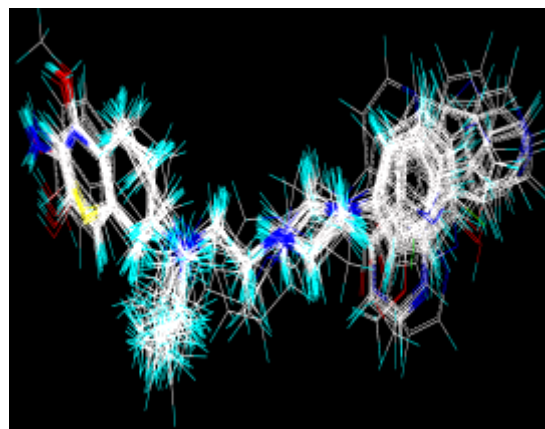

**Figure 1.** a) Flexible alignment for D2/D3 (selectivity) analysis and b) atom-based alignment for D2/D3 binding (selectivity) analysis with compound **42** as a template.
